# Supplementary material for: Functional decline in hospitalized older patients with coronavirus disease 2019: a retrospective cohort study
Source: Springer Nature journal article supplement (doi:10.1186/s12877-021-02597-w), 2021-11-12
Supplement: MOESM1 [file 19861736]

## **Additional file 1**

**Table S1.** Demographic and clinical characteristics of the study patients without very severe functional impairment before coronavirus disease 2019 onset

**Table S2.** Demographic and clinical characteristics of the study patients, including survivors and those who died

**Table S3.** Clinical courses and outcomes in the study patients including the sensitivity analyses

**Figure S1.** Associations between demographic and clinical characteristics at admission and a greater risk of functional decline in the analysis with age, the BI score, serum albumin level, and plasma D-dimer level as continuous/ordinal scales

**Figure S2.** Associations between the demographic and clinical characteristics at admission and a greater risk of functional decline in patients without very severe functional impairment before coronavirus disease 2019 onset

**Figure S3.** Associations between the demographic and clinical characteristics at admission and a greater risk of functional decline or death in patients, including survivors and those who died

**Table S1.** Demographic and clinical characteristics of the study patients without very severe functional impairment before coronavirus disease 2019 onset

|                                                              | All<br>(n=121)    | Functional decline<br>[FDG] (n=63) | Non-functional<br>decline<br>[Non-FDG] (n=58) | P value |
|--------------------------------------------------------------|-------------------|------------------------------------|-----------------------------------------------|---------|
| Age (years), median (IQR)                                    | 78.0 (71.0–84.0)  | 82.0 (75.5–88.5)                   | 73.0 (70.0–79.0)                              | <0.001  |
| Female, n (%)                                                | 60 (49.6)         | 41 (65.1)                          | 19 (32.8)                                     | 0.001   |
| Dementia, n (%)                                              | 41 (33.9)         | 35 (55.6)                          | 6 (10.3)                                      | <0.001  |
| Comorbidities ( $\geq 2$ ) <sup>a</sup> , n (%)              | 52 (43.0)         | 29 (46.0)                          | 23 (39.7)                                     | 0.582   |
| BI score before COVID-19 onset, median (IQR)                 | 100 (95–100)      | 95 (70–100)                        | 100 (100–100)                                 | <0.001  |
| 100 (independent), n (%)                                     | 88 (72.7)         | 31 (49.2)                          | 57 (98.3)                                     | <0.001  |
| 75–95 (mildly dependent), n (%)                              | 14 (11.6)         | 13 (20.6)                          | 1 (1.7)                                       |         |
| 25–70 (moderately-to-severely dependent), n (%)              | 19 (15.7)         | 19 (30.2)                          | 0 (0.0)                                       |         |
| Serum albumin level on admission, median (IQR)               | 3.4 (3.2–3.7)     | 3.3 (3.0–3.6)                      | 3.5 (3.2–3.8)                                 | 0.030   |
| Serum CRP level on admission, median (IQR)                   | 5.8 (1.2–10.3)    | 5.8 (1.4–10.9)                     | 5.6 (1.3–9.7)                                 | 0.817   |
| Plasma D-dimer level on admission, median (IQR) <sup>b</sup> | 1.3 (0.8–2.3)     | 1.5 (0.9–2.6)                      | 1.0 (0.8–2.2)                                 | 0.020   |
| GNRI on admission, median (IQR) <sup>c</sup>                 | 99.5 (93.2–107.1) | 97.4 (90.4–102.8)                  | 103.4 (95.7–109.4)                            | 0.004   |
| Severity of COVID-19 on admission                            |                   |                                    |                                               |         |
| Asymptomatic, n (%)                                          | 7 (5.8)           | 5 (7.9)                            | 2 (3.5)                                       | 0.466   |
| Mild, n (%)                                                  | 14 (11.6)         | 6 (9.5)                            | 8 (13.8)                                      |         |
| Moderate, n (%)                                              | 13 (10.7)         | 7 (11.1)                           | 6 (10.3)                                      |         |
| Severe, n (%)                                                | 69 (57.0)         | 33 (52.4)                          | 36 (62.1)                                     |         |
| Critical, n (%)                                              | 18 (14.9)         | 12 (19.0)                          | 6 (10.3)                                      |         |

|                                                                                    |               |               |               |        |
|------------------------------------------------------------------------------------|---------------|---------------|---------------|--------|
| Duration from the onset of COVID-19 to admission (days), median (IQR) <sup>d</sup> | 4.0 (2.0–7.5) | 2.0 (1.0–6.0) | 6.0 (3.8–9.0) | <0.001 |
| Route of admission                                                                 |               |               |               |        |
| Admission from LTC hospitals/facilities, n (%)                                     | 24 (19.8)     | 23 (36.5)     | 1 (1.7)       | <0.001 |
| Admission from home, n (%)                                                         | 97 (80.2)     | 40 (63.5)     | 57 (98.3)     |        |

BI, Barthel Index; COVID-19, coronavirus disease 2019; CRP, C-reactive protein; FDG, functional decline group;

GNRI, Geriatric Nutritional Risk Index; IQR, interquartile range; LTC, long-term care

a. Chronic respiratory disease, chronic kidney disease, diabetes, hypertension, and cardiovascular diseases

b. Data unavailable in one patient in the non-FDG

c. Data unavailable in 13 patients; nine in the FDG and four in the non-FDG

d. Data unavailable in six patients: four in the FDG and two in the non-FDG (mainly patients with asymptomatic COVID-19)

**Table S2.** Demographic and clinical characteristics of the study patients, including survivors and those who died

|                                                              | All<br>(n=155)    | Functional decline<br>or death [FDG]<br>(n=95) | Non-functional<br>decline<br>[Non-FDG] (n=60) | P value |
|--------------------------------------------------------------|-------------------|------------------------------------------------|-----------------------------------------------|---------|
| Age (years), median (IQR)                                    | 79.0 (72.0–85.5)  | 83.0 (76.0–88.0)                               | 73.0 (70.0–79.0)                              | <0.001  |
| Female, n (%)                                                | 76 (49.0)         | 56 (58.9)                                      | 20 (33.3)                                     | 0.003   |
| Dementia, n (%)                                              | 64 (41.3)         | 56 (58.9)                                      | 8 (13.3)                                      | <0.001  |
| Comorbidities ( $\geq 2$ ) <sup>a</sup> , n (%)              | 66 (42.6)         | 43 (45.3)                                      | 23 (38.3)                                     | 0.410   |
| BI score before COVID-19 onset, median (IQR)                 | 100 (70–100)      | 85 (50–100)                                    | 100 (100–100)                                 | <0.001  |
| 100 (independent), n (%)                                     | 96 (61.9)         | 39 (41.1)                                      | 57 (95.0)                                     | <0.001  |
| 75–95 (mildly dependent), n (%)                              | 19 (12.3)         | 18 (18.9)                                      | 1 (1.7)                                       |         |
| 25–70 (moderately-to-severely dependent), n (%)              | 26 (16.8)         | 26 (27.3)                                      | 0 (0.0)                                       |         |
| <25 (very severely dependent), n (%)                         | 14 (9.0)          | 12 (12.6)                                      | 2 (3.3)                                       |         |
| Serum albumin level on admission, median (IQR) <sup>b</sup>  | 3.4 (3.2–3.7)     | 3.3 (3.1–3.6)                                  | 3.5 (3.2–3.8)                                 | 0.026   |
| Serum CRP level on admission, median (IQR)                   | 5.8 (1.4–10.9)    | 5.8 (1.4–11.8)                                 | 5.6 (1.5–9.8)                                 | 0.731   |
| Plasma D-dimer level on admission, median (IQR) <sup>c</sup> | 1.4 (0.9–2.5)     | 1.5 (1.0–2.8)                                  | 1.0 (0.8–2.2)                                 | 0.005   |
| GNRI on admission, median (IQR) <sup>d</sup>                 | 98.7 (92.4–107.0) | 96.9 (88.7–103.1)                              | 103.3 (95.2–109.3)                            | 0.001   |
| Severity of COVID-19 on admission                            |                   |                                                |                                               |         |
| Asymptomatic, n (%)                                          | 9 (5.8)           | 6 (6.3)                                        | 3 (5.0)                                       | 0.510   |
| Mild, n (%)                                                  | 17 (11.0)         | 9 (9.5)                                        | 8 (13.3)                                      |         |
| Moderate, n (%)                                              | 14 (9.0)          | 7 (7.4)                                        | 7 (11.7)                                      |         |
| Severe, n (%)                                                | 91 (58.7)         | 55 (57.9)                                      | 36 (60.0)                                     |         |
| Critical, n (%)                                              | 24 (15.5)         | 18 (18.9)                                      | 6 (10.0)                                      |         |

|                                                                                    |               |               |               |        |
|------------------------------------------------------------------------------------|---------------|---------------|---------------|--------|
| Duration from the onset of COVID-19 to admission (days), median (IQR) <sup>e</sup> | 3.0 (2.0–7.0) | 2.0 (1.0–5.0) | 6.0 (3.0–9.0) | <0.001 |
| Route of admission                                                                 |               |               |               |        |
| Admission from LTC hospitals/facilities, n (%)                                     | 44 (28.4)     | 42 (44.2)     | 2 (3.3)       | <0.001 |
| Admission from home, n (%)                                                         | 111 (71.6)    | 53 (55.8)     | 58 (96.7)     |        |

BI, Barthel Index; COVID-19, coronavirus disease 2019; CRP, C-reactive protein; FDG, functional decline group;

GNRI, Geriatric Nutritional Risk Index; IQR, interquartile range; LTC, long-term care

a. Chronic respiratory disease, chronic kidney disease, diabetes, hypertension, and cardiovascular diseases

b. Data unavailable in one patient in the non-FDG

c. Data unavailable in two patients: one in the FDG and one in the non-FDG

d. Data unavailable in 23 patients: 18 in the FDG and five in the non-FDG

e. Data unavailable in eight patients: five in the FDG and three in the non-FDG (mainly patients with asymptomatic COVID-19)

**Table S3.** Clinical courses and outcomes in the study patients including the sensitivity analyses

|                                                                                                       |                     | Functional decline<br>[FDG] | Non-functional decline<br>[Non-FDG] | P value |
|-------------------------------------------------------------------------------------------------------|---------------------|-----------------------------|-------------------------------------|---------|
| <i>Study patients without very severe functional impairment before coronavirus disease 2019 onset</i> |                     |                             |                                     |         |
| N                                                                                                     |                     | 63                          | 58                                  |         |
| Highest severity of COVID-19 during hospitalization                                                   | Asymptomatic, n (%) | 4 (6.3)                     | 2 (3.4)                             | 0.113   |
|                                                                                                       | Mild, n (%)         | 4 (6.3)                     | 7 (12.1)                            |         |
|                                                                                                       | Moderate, n (%)     | 4 (6.3)                     | 6 (10.3)                            |         |
|                                                                                                       | Severe, n (%)       | 32 (50.8)                   | 36 (62.1)                           |         |
|                                                                                                       | Critical, n (%)     | 19 (30.2)                   | 7 (12.1)                            |         |
| Rehabilitation during the hospitalization, n (%)                                                      |                     | 31 (49.2)                   | 25 (43.1)                           | <0.001  |
| Length of stay (days), median (IQR)                                                                   |                     | 17.0 (11.5–35.5)            | 11.0 (8.0–15.0)                     | <0.001  |
| Admission from home but discharge to LTC hospitals/facilities, n (% of patients admitted from home)   |                     | 24 / 40 (60.0)              | 2 / 57 (3.5)                        | <0.001  |
| <i>Study patients including survivors and those who died</i>                                          |                     |                             |                                     |         |
| N                                                                                                     |                     | 95                          | 60                                  |         |
| Highest severity of COVID-19 during hospitalization                                                   | Asymptomatic, n (%) | 5 (5.3)                     | 3 (5.0)                             | 0.001   |
|                                                                                                       | Mild, n (%)         | 6 (6.3)                     | 7 (11.7)                            |         |
|                                                                                                       | Moderate, n (%)     | 4 (4.2)                     | 7 (11.7)                            |         |
|                                                                                                       | Severe, n (%)       | 38 (40.0)                   | 36 (60.0)                           |         |
|                                                                                                       | Critical, n (%)     | 42 (44.2)                   | 7 (11.7)                            |         |
| Rehabilitation during the hospitalization, n (%)                                                      |                     | 72 (75.8)                   | 25 (41.7)                           | <0.001  |
| Length of stay (days), median (IQR)                                                                   |                     | 16.0 (12.0–28.5)            | 11.0 (8.0–15.3)                     | <0.001  |
| Admission from home but discharge to LTC hospitals/facilities, n (% of patients admitted from home)   |                     | 24 / 53 (45.3)              | 3 / 58 (5.2)                        | <0.001  |

COVID-19, coronavirus disease 2019; FDG, functional decline group; IQR, interquartile range; LTC, long-term care

**Figure S1.** Associations between demographic and clinical characteristics at admission and a greater risk of functional decline in the analysis with age, the BI score, serum albumin level, and plasma D-dimer level as continuous/ordinal scales

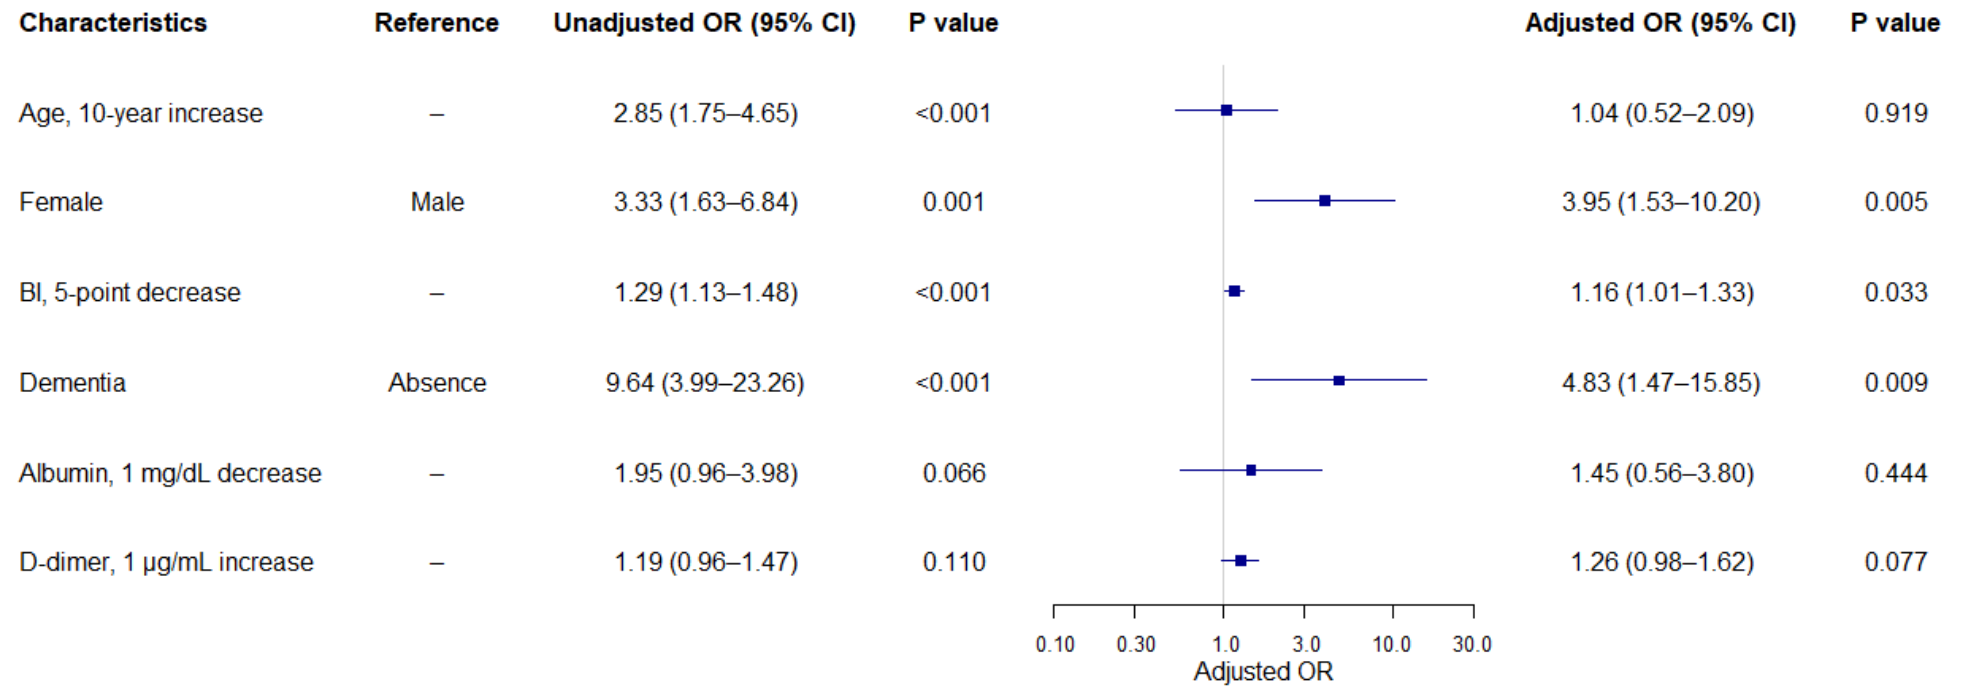

BI, Barthel Index; OR, odds ratio

**Figure S2.** Associations between the demographic and clinical characteristics at admission and a greater risk of functional decline in patients without very severe functional impairment before coronavirus disease 2019 onset

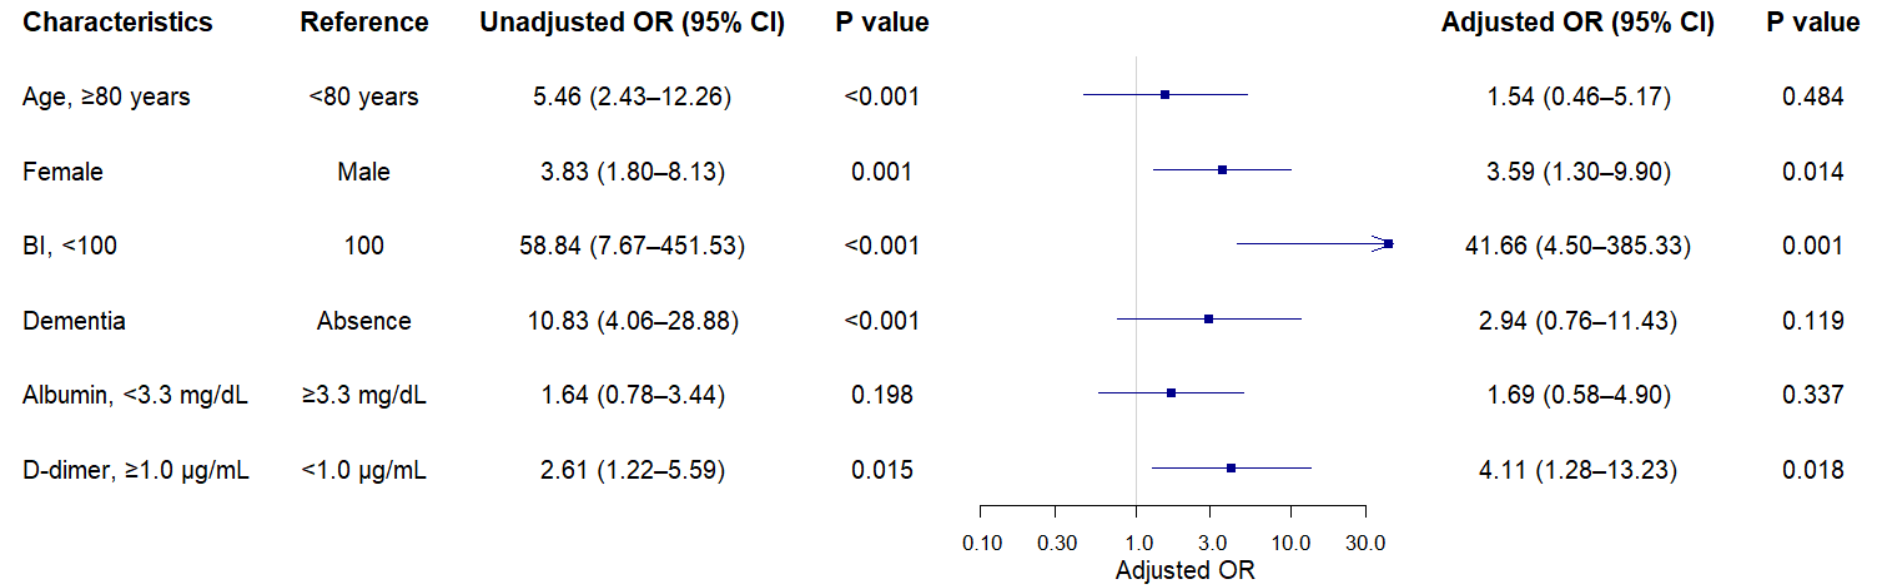

BI, Barthel Index; OR, odds ratio



**Figure S3.** Associations between the demographic and clinical characteristics at admission and a greater risk of functional decline or death in patients, including survivors and those who died

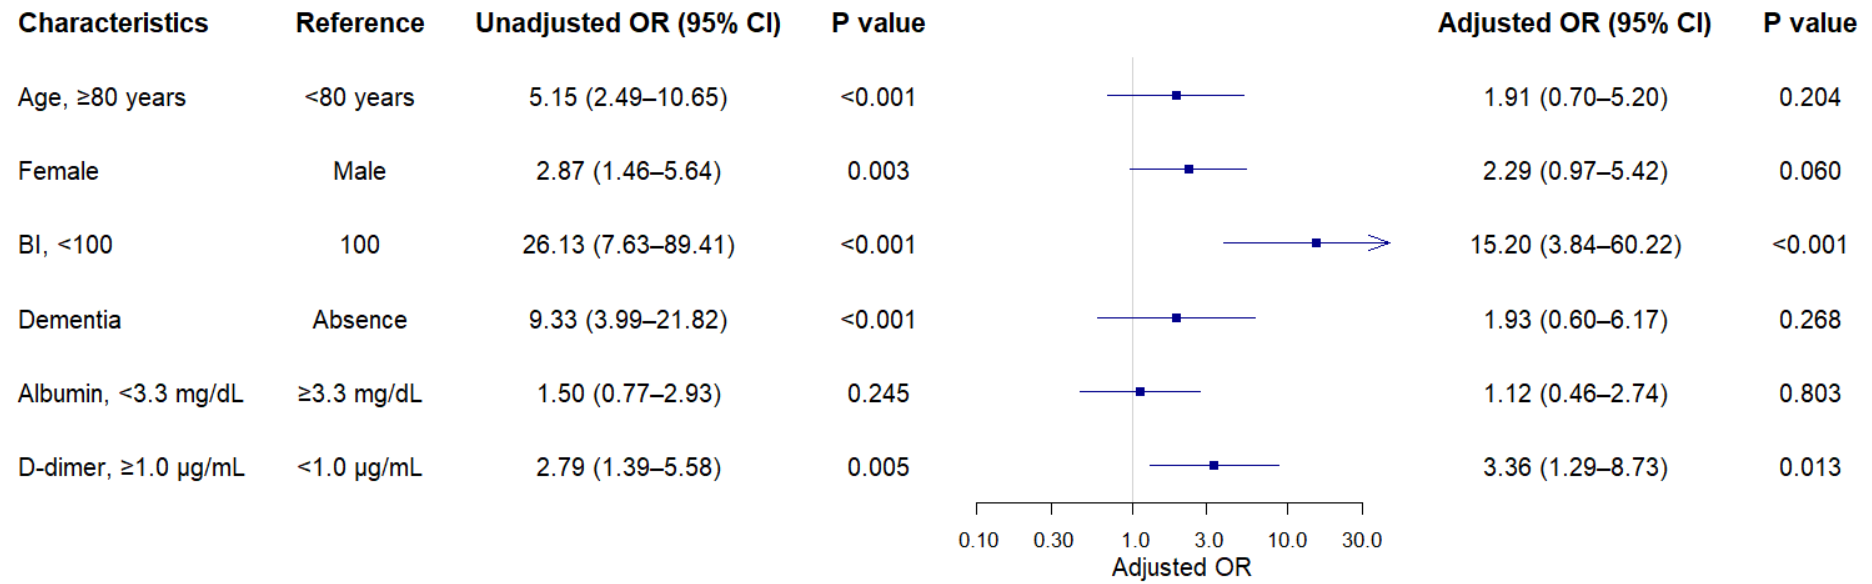

BI, Barthel Index; OR, odds ratio
